# Supplementary material for: Elucidating multiple reaction pathways for the degradation of antibiotics in water by a self-active single-atom zinc catalyst on biochar
Source: Royal Society of Chemistry journal article supplement (doi:10.1039/d3su00265a), 2023-01-01
Supplement: d3su00265a1.pdf [file d3su00265a1.pdf]

1 **Supporting Information:**

2 **Elucidating Multiple Reaction Pathways for the Degradation of Antibiotics in Water by**  
3 **Self-Active Single-Atom Zinc Catalyst on Biochar**

4 Jieming Yuan<sup>1</sup>, Yunkyoungh Han<sup>1</sup>, Krishnamoorthy Sathiyam<sup>2</sup>, Virender K. Sharma<sup>2,\*</sup>, Abdol  
5 Hadi Mokarizadeh<sup>3</sup>, Mesfin Tsige<sup>3</sup>, Jiechao Jiang<sup>4</sup>, Xingmao Ma<sup>1,\*</sup>

6 <sup>1</sup>Department of Civil and Environmental Engineering, Texas A&M University,  
7 College Station, TX, 77843

8 <sup>2</sup>Program for Environment and Sustainability, Department of Environmental and  
9 Occupational Health, Texas A&M University, College Station, TX, 77843

10 <sup>3</sup>Department of Polymer Science and Polymer Engineering, University of Akron,  
11 Akron, OH, 44325

12 <sup>4</sup>Department of Materials Science & Engineering, University of Texas at Arlington,  
13 Arlington, TX, 76019

14  
15  
16  
17 **Corresponding author:**

18 Dr. Xingmao Ma

19 Email: [xma@civil.tamu.edu](mailto:xma@civil.tamu.edu)

20 Dr. Virender K. Sharma

21 Email: [vsharma@tamu.edu](mailto:vsharma@tamu.edu)

22

# Table of Contents

|    |                                    |    |
|----|------------------------------------|----|
| 23 |                                    |    |
| 24 | Section A. Materials .....         | 3  |
| 25 | Chemicals and Materials .....      | 3  |
| 26 | Degradation products of TMP .....  | 4  |
| 27 | Superoxide radical detection ..... | 4  |
| 28 | Hydrogen peroxide detection.....   | 4  |
| 29 | Section B. Supporting Figures..... | 6  |
| 30 | Section C. Supporting Tables ..... | 18 |
| 31 |                                    |    |
| 32 | Supplementary Texts: 4             |    |
| 33 | Supplementary Figures: 12          |    |
| 34 | Supplementary Tables: 4            |    |
| 35 |                                    |    |
| 36 |                                    |    |
| 37 |                                    |    |
| 38 |                                    |    |
| 39 |                                    |    |
| 40 |                                    |    |
| 41 |                                    |    |
| 42 |                                    |    |
| 43 |                                    |    |
| 44 |                                    |    |
| 45 |                                    |    |
| 46 |                                    |    |

## 47 **Section A. Materials**

### 48 **Chemicals and Materials**

49 Post oak pellet was obtained from B&B Charcoal (Weimar, USA). Trimethoprim (TMP,  
50  $\geq 98.0\%$ ) and sulfamethoxazole (SMX,  $\geq 98.0\%$ ) were purchased from TCI America (Portland,  
51 USA). 5,5-dimethyl-1-pyrroline N-oxide (DMPO,  $\geq 98.0\%$ ), hydrogen peroxide ( $H_2O_2$ , 30%)  
52 and hydrochloric acid (HCl, 33-38%) were obtained from Fisher Chemical (Waltham, USA).  
53 2,2,6,6-tetramethyl-4-piperidinol (TEMPO, 99%) and ammonium metavanadate ( $NH_4VO_3$ ,  
54 99.5%) were purchased from ACROS Organics (Waltham, USA). L-histidine (L-his,  $\geq 98.0\%$ ),  
55 nitro blue tetrazolium (NBT,  $\geq 98.0\%$ ) and dicyandiamide (98.0%) were purchased from Alfa  
56 Aesar (Haverhill, USA). The following chemicals were purchased from different suppliers:  
57 methanol (MeOH, reagent grade) from VWR Chemicals (Radnor, USA), acetonitrile ( $CH_3CN$ ,  
58  $\geq 99.7\%$ ) from BTC (Hudson, USA), superoxide dismutase (SOD, 6010 U/mg) from Millipore  
59 Sigma (Burlington, USA), and zinc nitrate ( $Zn(NO_3)_2$ ,  $\geq 98.5\%$ ) from Spectrum Chemical  
60 (New Brunswick, USA). All chemicals were used as received. Industrial-grade nitrogen used  
61 in the experiment was purchased from Airgas (Radnor, USA). All solutions were prepared  
62 using ultrapure water produced by a NANOpure II filter from Thermo Fisher Scientific  
63 (Waltham, USA)

64

65

66

67

68

## 69 **Degradation products of TMP**

70 Samples collected at 0, 0.5, and 2.0 hours were used to identify TMP degradation products.  
71 Solid-phase extraction (SPE) was used to concentrate TMP and its metabolites in the samples.  
72 Waters Oasis HLB cartridges (WAT106202, 6 cc/200 mg) were pre-conditioned with 5.0 mL  
73 methanol and 5.0 mL ultrapure water in the SPE analysis before they were loaded with 1.0 mL  
74 samples. The cartridges were vacuum-dried for 10 minutes after loading, and the samples were  
75 eluted with 1.0 mL of methanol and stored in 2 mL microtubes. Untargeted analysis was  
76 performed with a liquid chromatography high-resolution accurate mass spectrometry (LC-  
77 HRAM) fitted with a Q Exactive Plus Orbitrap mass spectrometer (Thermo Fisher Scientific,  
78 Waltham, USA) and connected to a binary pump UltiMate 3000 HPLC (Sunnyvale, USA).

79

## 80 **Superoxide radical detection**

81 The presence of superoxide radical ( $O_2^{\cdot-}$ ) was determined by the reaction between  $O_2^{\cdot-}$   
82 and nitroblue tetrazolium chloride (NBT) (Goto et al. 2004). Briefly, 0.5 mg SAZn@BC was  
83 added into 10  $\mu$ M NBT solution (10 mL) and stirred at 400 rpm for one hour. 2 mL samples  
84 were taken at 0, 30, and 60 mins and filtered through a 0.45  $\mu$ m syringe filter. NBT in the  
85 filtrate was analyzed by a UV-vis-NIR spectrophotometer (Hitachi U-4100) at 260 nm.

86

## 87 **Hydrogen peroxide detection**

88 The generation of hydrogen peroxide ( $H_2O_2$ ) was confirmed by the reaction between  $H_2O_2$

89 and metavanadate to produce peroxovanadate (Nogueira et al. 2005). 0.5 mg SAZn@BC was  
90 added into 0.2 mM ammonia metavanadate solution (10 mL) and stirred at 400 rpm for 20  
91 minutes with pH adjusted to 3.0, 5.0, and 6.0, respectively. The mixture of 0.2 mM H<sub>2</sub>O<sub>2</sub> and  
92 0.2 mM ammonia metavanadate was stirred at 400 rpm for 20 minutes as a control. The  
93 produced peroxovanadate was detected with a UV-vis-NIR spectrophotometer (Hitachi U-  
94 4100) at 450 nm.

95

96

97

98

99

100

101

102

103

104

105

106

107

108

109

110

111 Section B. Supporting Figures

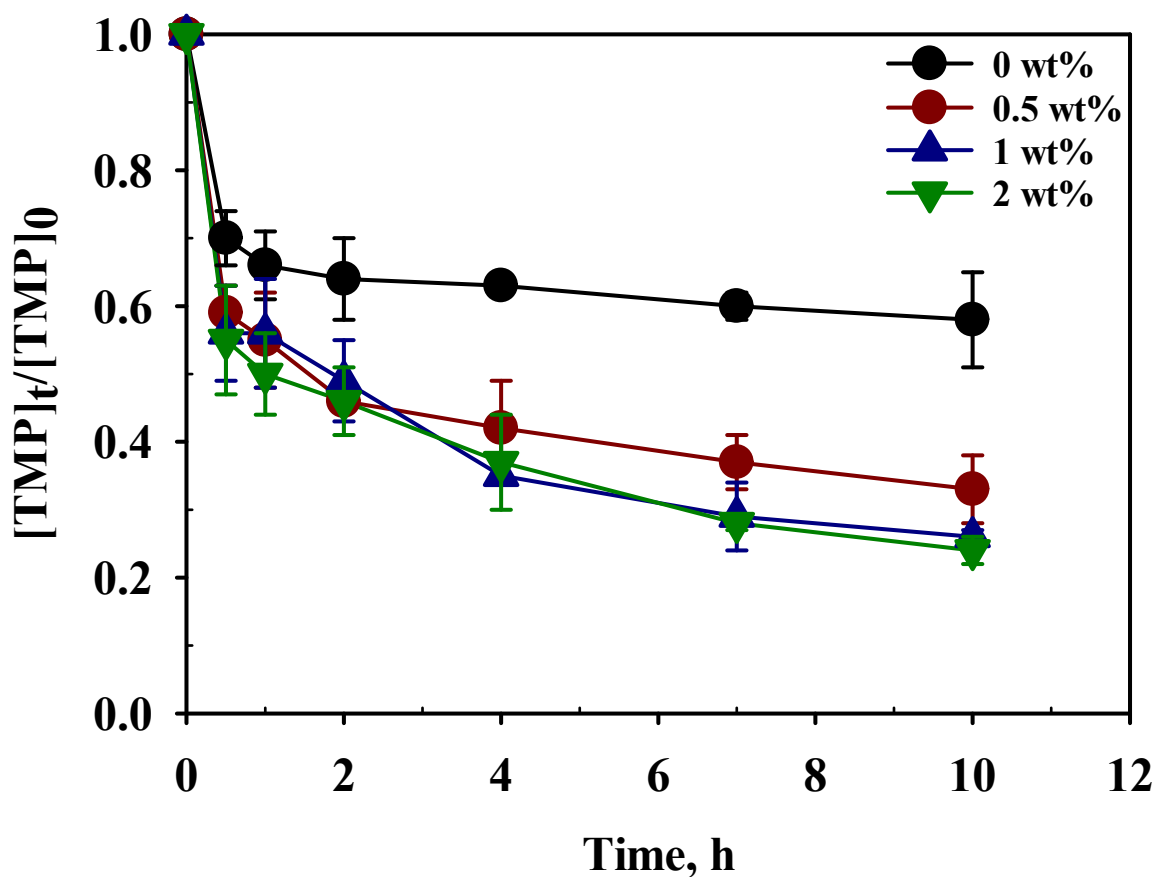

112

113 **Figure S1.** TMP removal by SAZn@BC with different Zn wt%. Reaction conditions:  $[TMP]_0 =$

114  $10.0 \mu\text{M}$ ,  $[\text{Biochar}] = 0.2 \text{ g/L}$ ,  $[\text{pH}] = 4.3$ ,  $T = 25.0^\circ\text{C}$ .

115

116

117

118

119

120

121

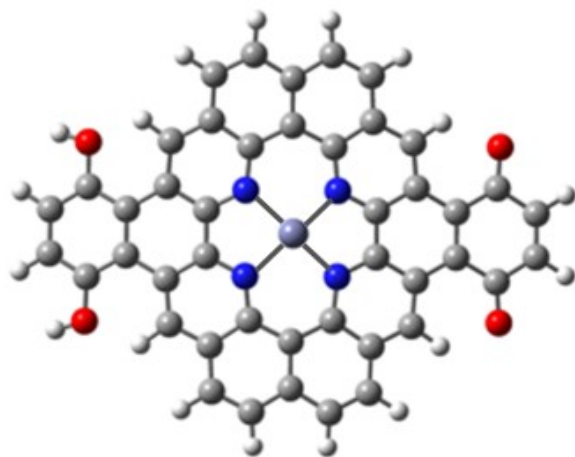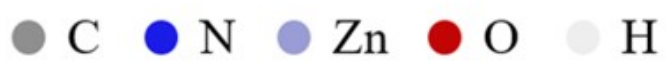

122

123 **Figure S2.** Single catalyst model of SAZn@BC for DFT calculation.

124

125

126

127

128

129

130

131

132

133

134

135

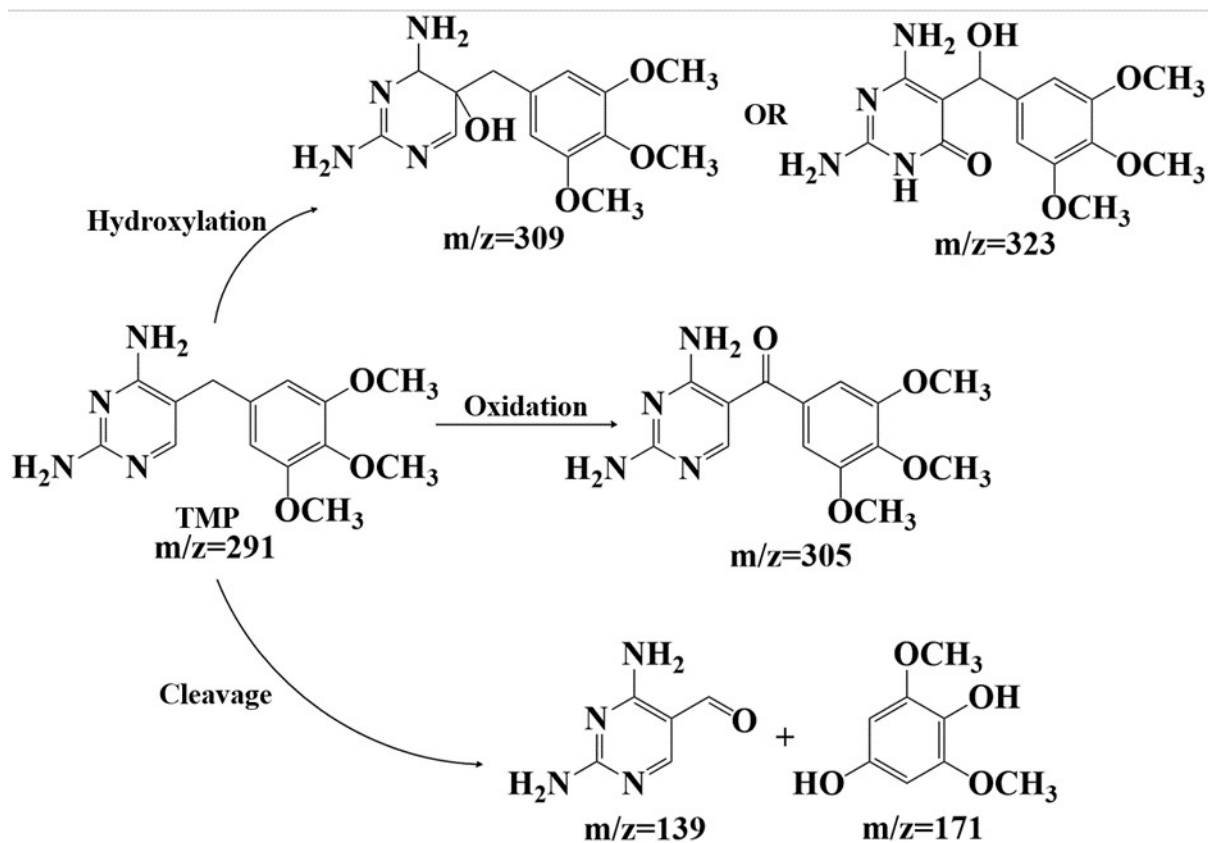

136

137

138 **Figure S3.** Plausible degradation products and degradation pathways of TMP by SAZn@BC.

139

140

141

142

143

144

145

146

147



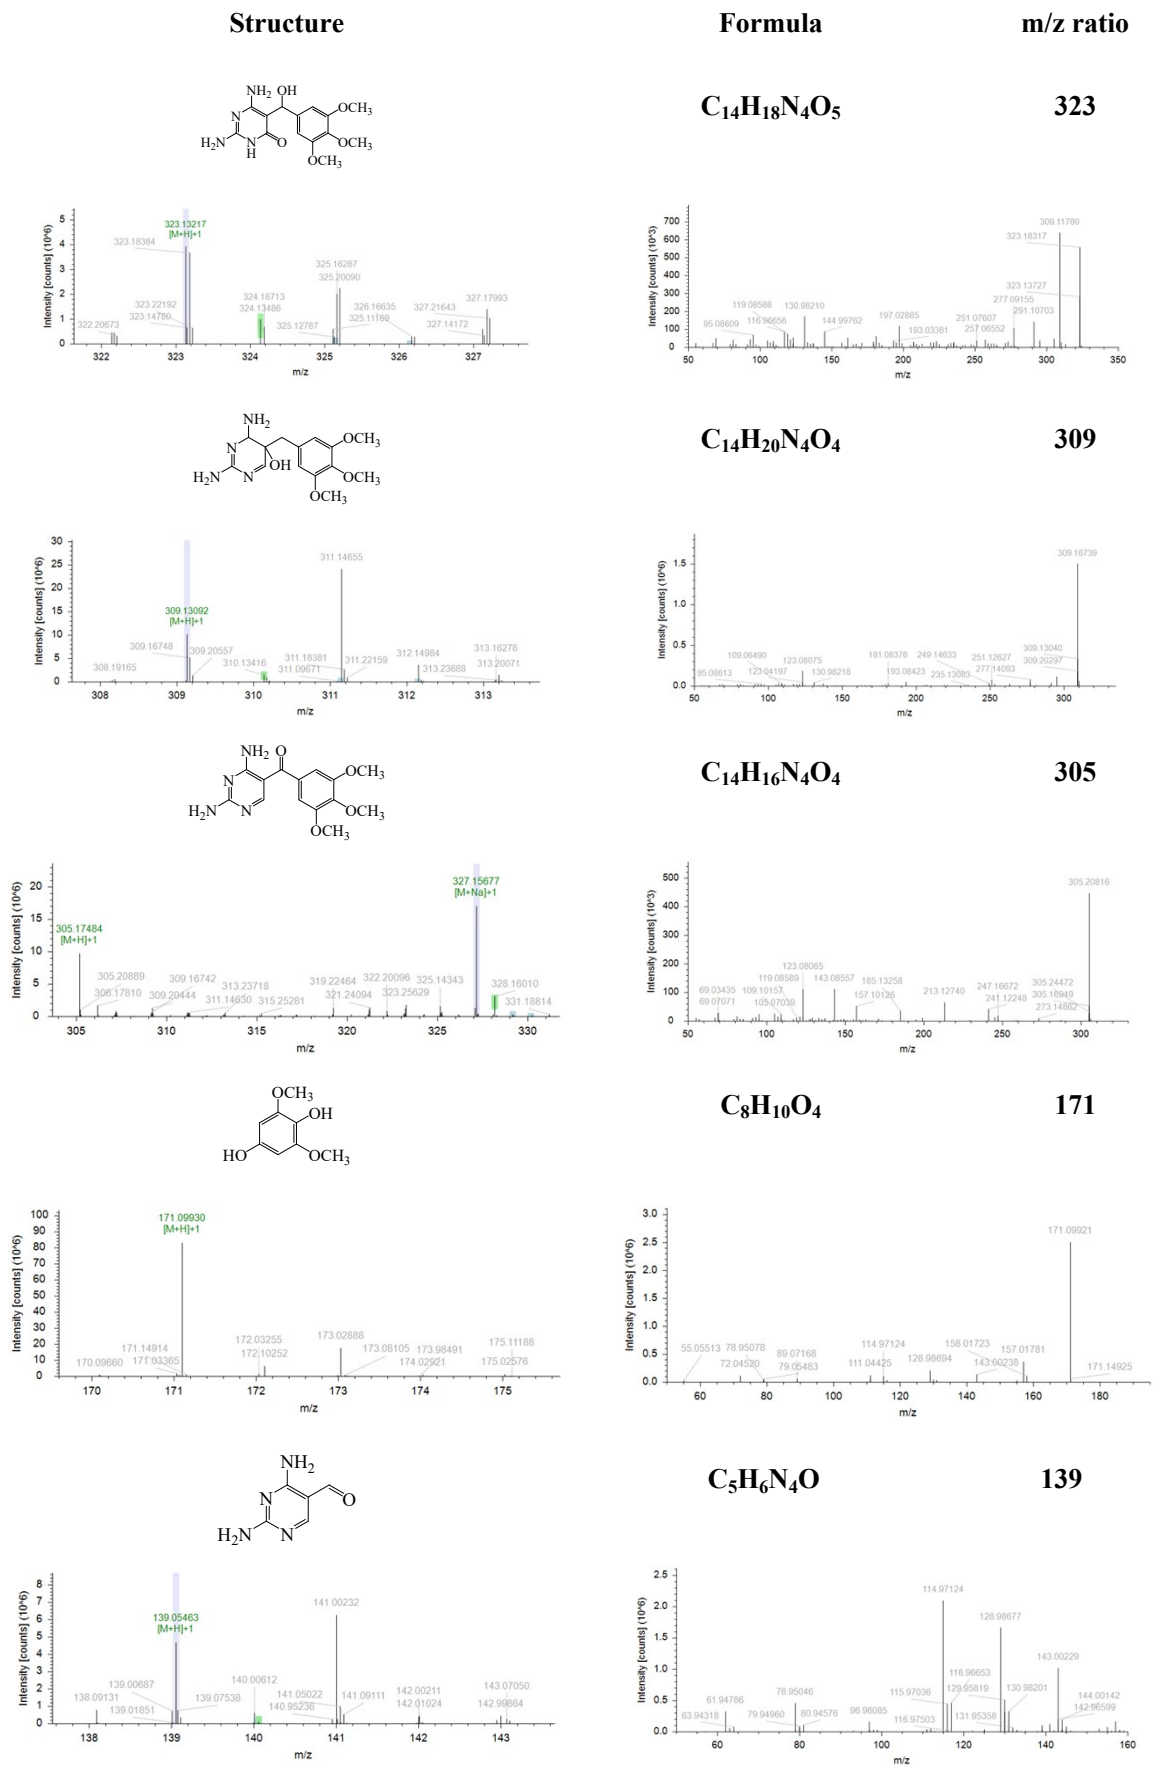

148 **Figure S4.** MS1 and MS2 spectra of possible TMP degradation metabolites.

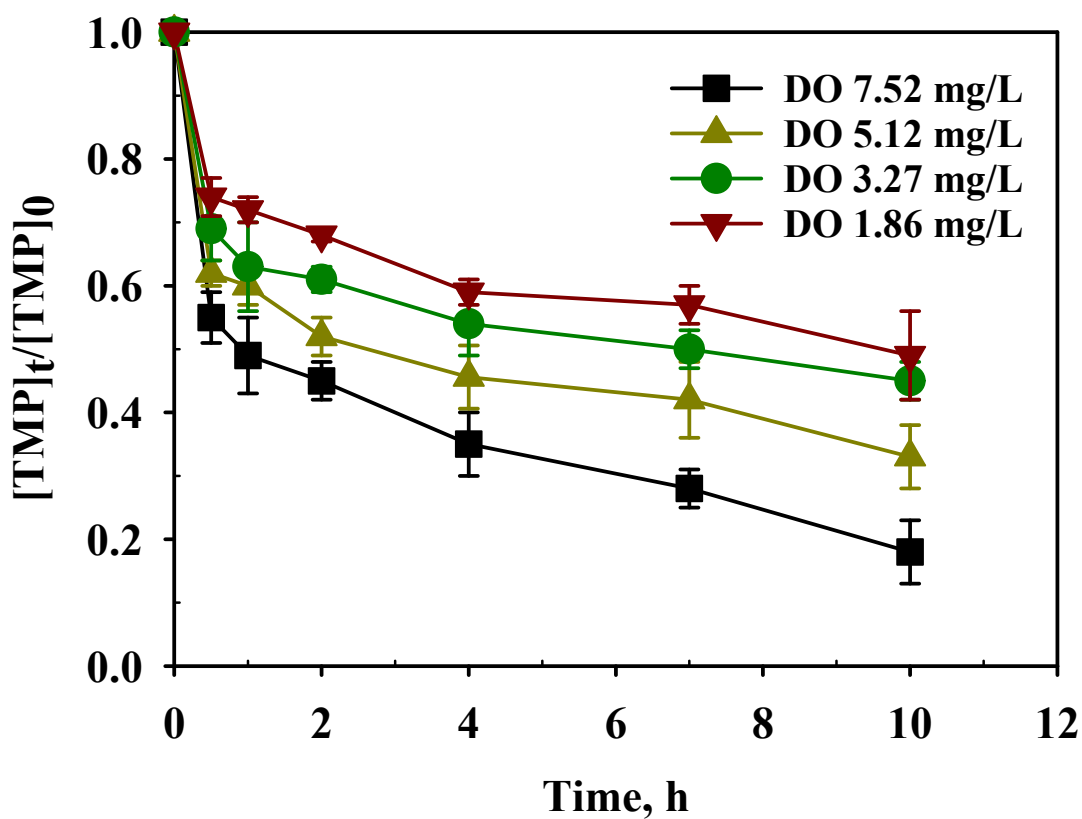

149

150 **Figure S5.** The effect of Do level on the performance of TMP removal by SAZn@BC Reaction

151 conditions:  $[TMP]_0 = 10 \mu\text{M}$ ,  $[\text{Biochar}] = 0.2 \text{ g/L}$ ,  $[\text{pH}] = 4.5$ ,  $T = 25^\circ\text{C}$ .

152

153

154

155

156

157

158

159

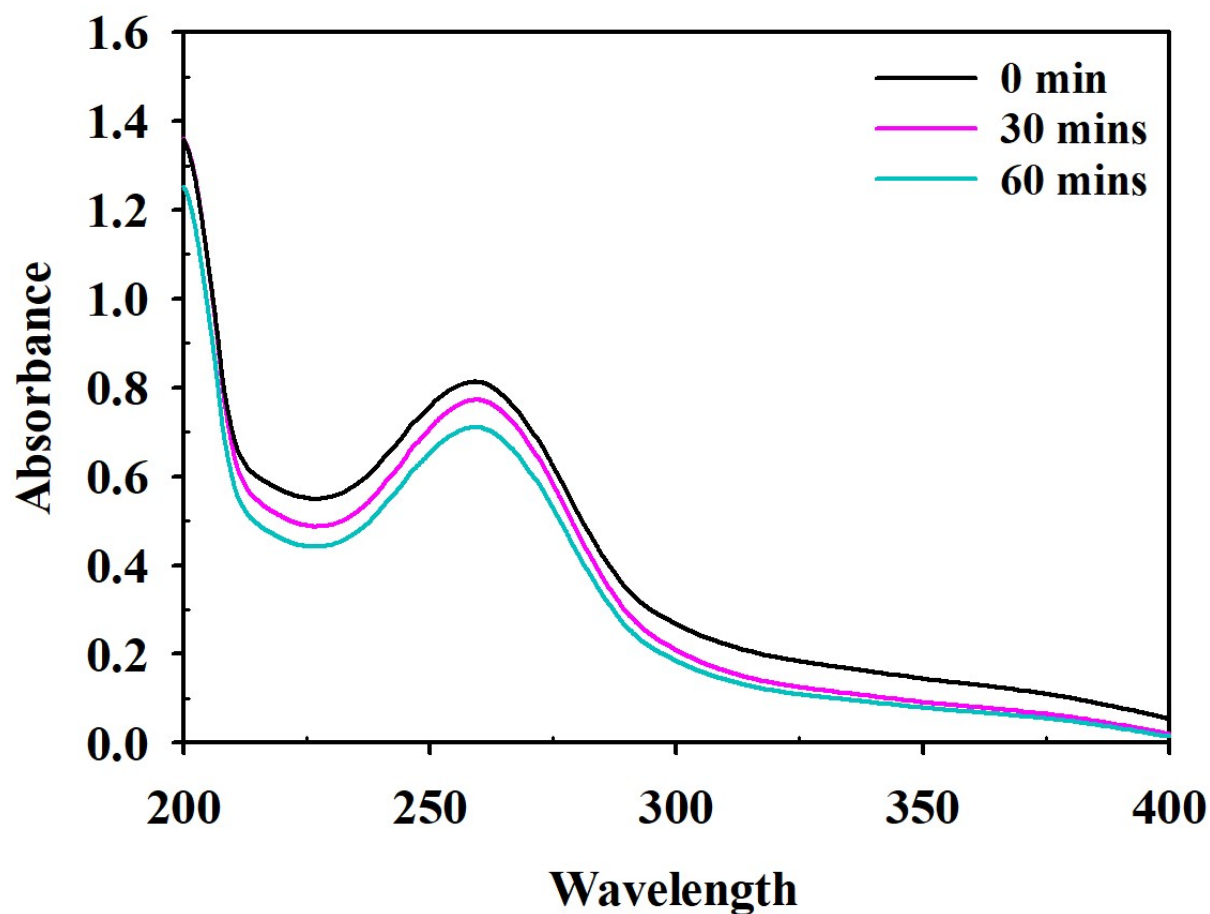

160

161 **Figure S6.** Detection of superoxide radical in SAZn@BC system. Reaction condition:

162 [Biochar] = 0.5 g/L, [NBT]<sub>0</sub> = 10 μM.

163

164

165

166

167

168

169

170

171

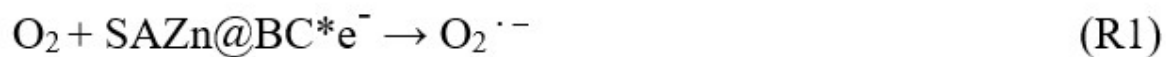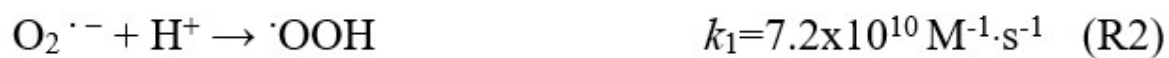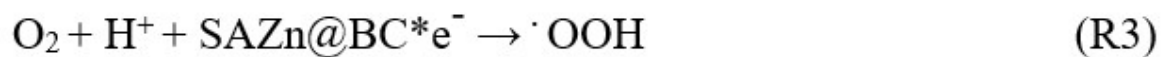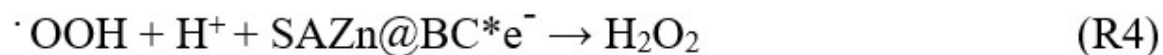

172

173 **Figure S7.** Proposed reactions for the reactive species generation by the SAZn@BC.

174

175

176

177

178

179

180

181

182

183

184

185

186

187

188

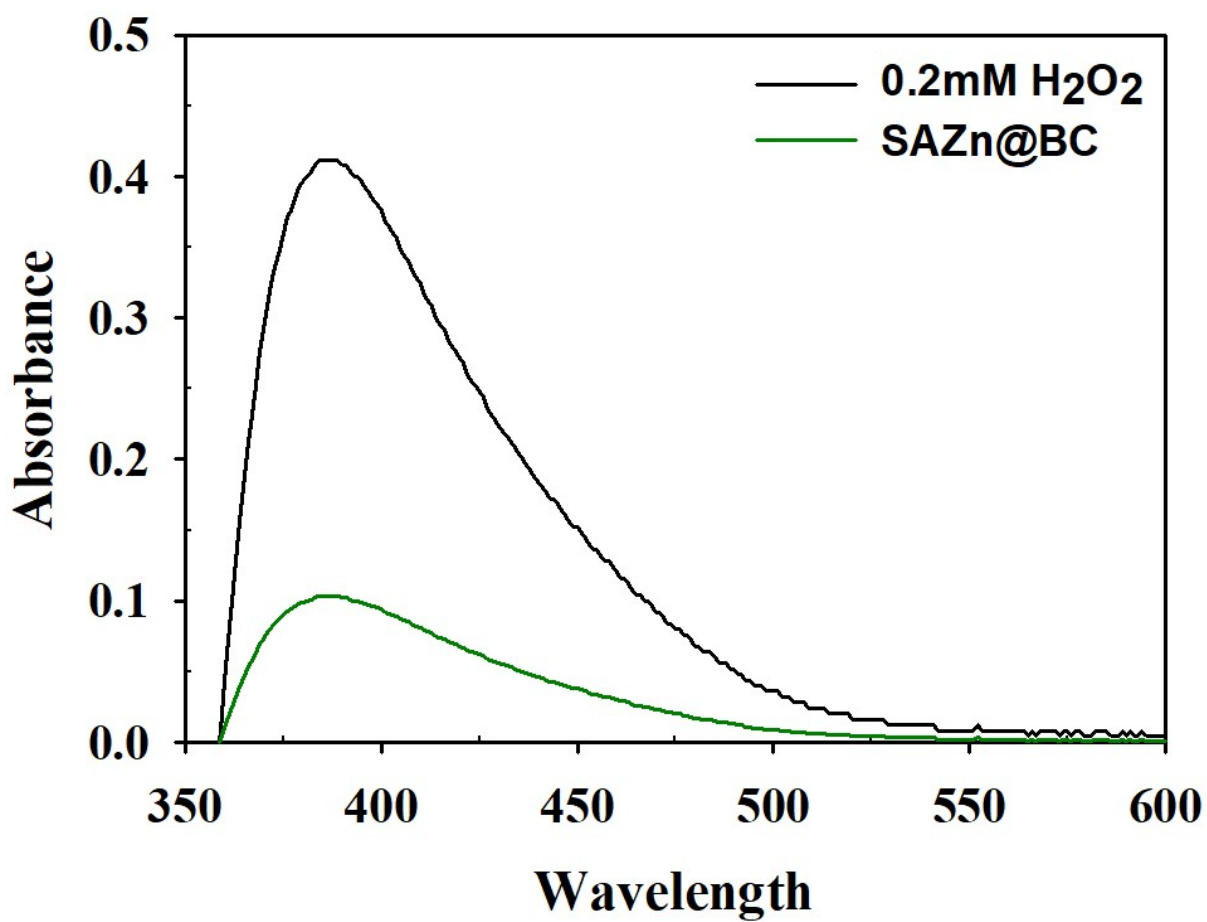

189

190 **Figure S8.** Detection of H<sub>2</sub>O<sub>2</sub> in SAZn@BC system. Reaction condition: [Biochar] = 0.5 g/L,

191 [NH<sub>4</sub>VO<sub>3</sub>]<sub>0</sub> = 0.2 mM. H<sub>2</sub>O<sub>2</sub> reference has a concentration of 0.2 mM.

192

193

194

195

196

197

198

199

200

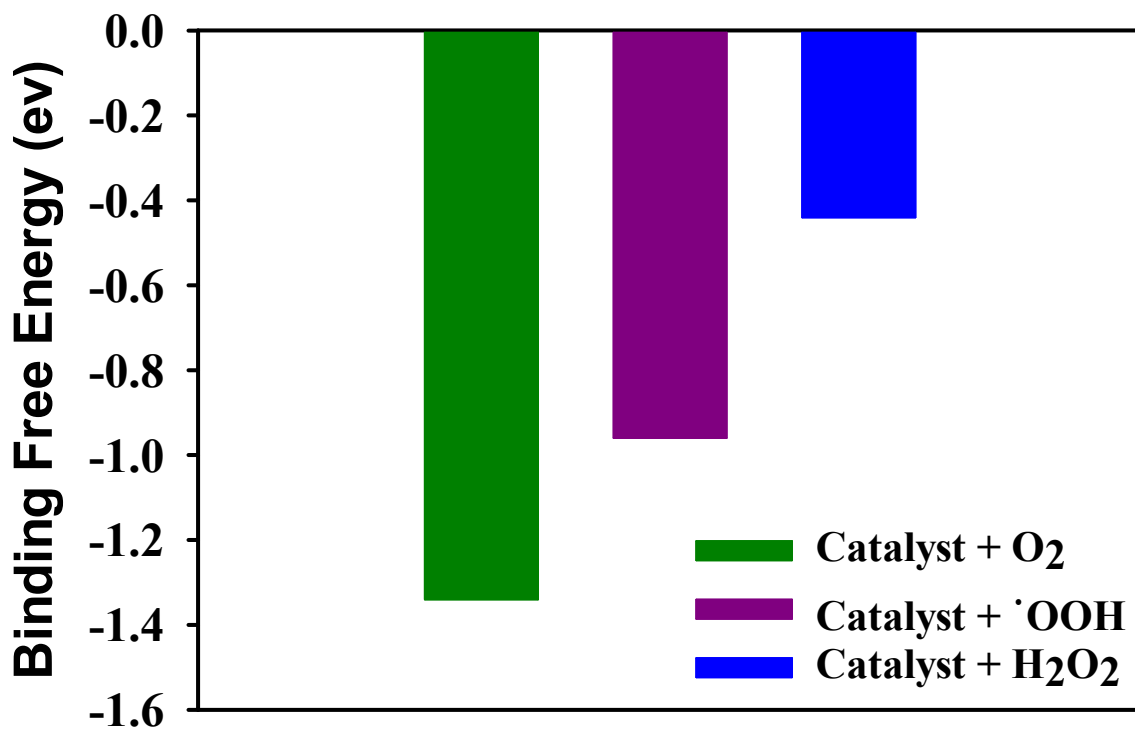

201

202 **Figure S9.** Binding free energy between SAC, O<sub>2</sub>, OOH and H<sub>2</sub>O<sub>2</sub> (H<sub>2</sub>Q for hydroquinone  
203 state and Q for quinone state).

204

205

206

207

208

209

210

211

212

213

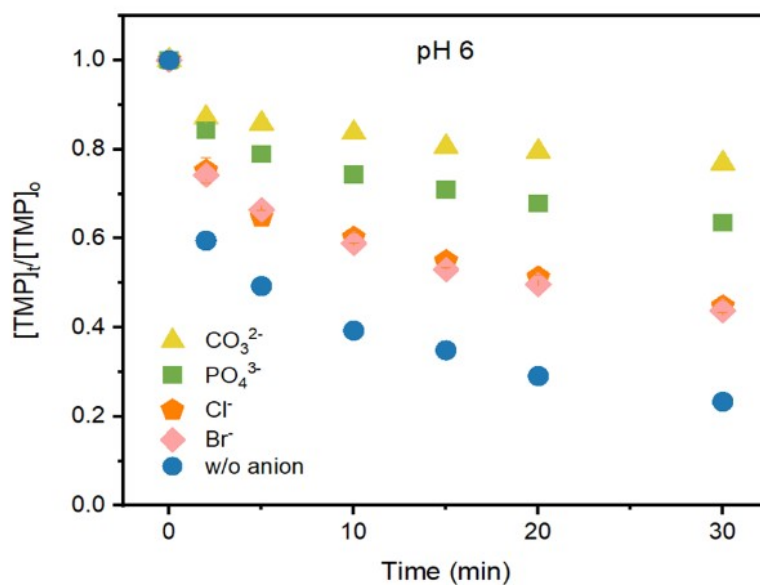

214

215 **Figure S10.** (a) Trimethoprim (TMP) removal by SAZn@BC in the presence of different

216 inorganic anions in the solution. Reaction conditions: Running time = 10 hours, [TMP<sub>0</sub>] = 10

217 μM, [Biochar] = 0.2 g/L, [CO<sub>3</sub><sup>2-</sup>] = 50 mM, [PO<sub>4</sub><sup>3-</sup>] = 50 mM, [Cl<sup>-</sup>] = 50 mM, [Br<sup>-</sup>] = 50 mM.

218 pH = 6.0, T = 25.0°C.

219

220

221

222

223

224

225

226

227

228

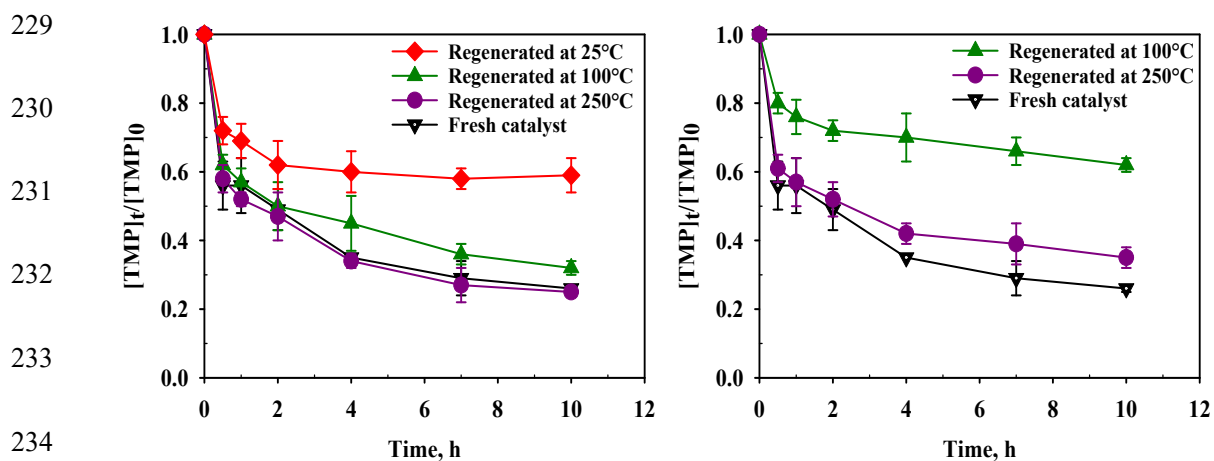

235 **Figure S11.** (a) Trimethoprim (TMP) degradation by SAZn@BC regenerated at different  
 236 reheating temperatures after first cycle of reaction. (b) TMP degradation by SAZn@BC  
 237 regenerated at different reheating temperatures after second cycle of reaction.

238

239

240

241

242

243

244

245

246

247

248

249

250



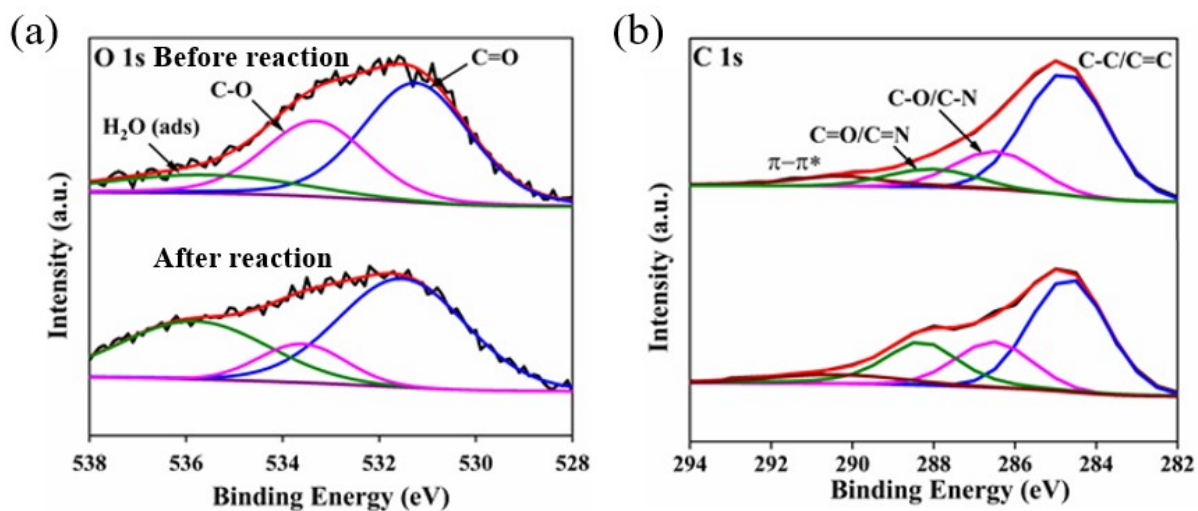

251

252 **Figure S12.** XPS spectra of SAZn@BC before and after the reaction. (a) The O 1s spectrum,  
 253 and (b) The C 1s spectrum. The spectra of SAZn@BC before the reaction are at the top and  
 254 after the reaction are at the bottom in each panel.

255

256

257

258

259

260

261

262

263

264

265

266

267 **Section C. Supporting Tables**

268 **Table S1.** Free energy of intermediates at potential relative to free catalyst and oxygen for

269 SAZn@BC containing Zn sites.

| Reaction                       | R1    | R3    | R4    |
|--------------------------------|-------|-------|-------|
| Free energy (eV) at U = 0 V    | -1.70 | -1.91 | -1.40 |
| Free energy (eV) at U = 0.22 V | -1.70 | -1.69 | -0.96 |

270

271

272 **Table S2.** Free energy of intermediates at potential relative to free catalyst and oxygen for

273 SAZn@BC without Zn sites.

| Reaction                       | R1   | R3    |
|--------------------------------|------|-------|
| Free energy (eV) at U = 0 V    | 0.48 | -0.85 |
| Free energy (eV) at U = 0.22 V | 0.48 | -0.62 |

274

275

276 **Table S3.** Partial charge from Natural Population Analysis values for catalyst

| Combination    | SAC/O <sub>2</sub> | SAC/·OOH | SAC/TMP |
|----------------|--------------------|----------|---------|
| Partial charge | 0.76               | 0.76     | -0.10   |

277

278

279

280

| <b>Catalyst</b>                      | <b>Dosage<br/>(g L<sup>-1</sup>)</b> | <b>System</b>            | <b>Initial<br/>TMP<br/>concentrat<br/>ion (μM)</b> | <b>Secon<br/>rate<br/>constant<br/>(L/g.min)</b> | <b>Reference</b>             |
|--------------------------------------|--------------------------------------|--------------------------|----------------------------------------------------|--------------------------------------------------|------------------------------|
| SAZn@BC                              | 0.2                                  | Catalyst only            | 10                                                 | 8.07x10 <sup>-2</sup>                            | This work                    |
| N-doped<br>Biochar                   | 1                                    | Persulfate<br>activation | 45                                                 | 8.7x10 <sup>-3</sup>                             | (Annamalai and<br>Shin 2022) |
| Malt rootlet<br>biochar              | 0.045                                | persulfate<br>activation | 3.7                                                | 6.88x10 <sup>-2</sup>                            | (Grilla et al.<br>2020)      |
| Co <sub>3</sub> O <sub>4</sub> /BiOI | 0.8                                  | Photocatalysis           | 0.07                                               | 1.57x10 <sup>-2</sup>                            | (Malefane et al.<br>2020)    |
| Co-doped<br>organic<br>aerogels      | 0.01                                 | Photocatalysis           | 10                                                 | 1.31                                             | (Bolobajev et<br>al. 2019)   |
| Ni-doped<br>organic<br>aerogels      | 0.01                                 | Photocatalysis           | 10                                                 | 1.48                                             | (Bolobajev et<br>al. 2019)   |
| Zn-doped<br>organic<br>aerogels      | 0.01                                 | Photocatalysis           | 10                                                 | 1.24                                             | (Bolobajev et<br>al. 2019)   |
| Fe-doped<br>organic<br>aerogels      | 0.01                                 | Photocatalysis           | 10                                                 | 1.21                                             | (Bolobajev et<br>al. 2019)   |
| TiO <sub>2</sub> -P25                | 1                                    | Photocatalysis           | 1                                                  | 2.4 x10 <sup>-3</sup>                            | (Oros-Ruiz et<br>al. 2013)   |
| Au/TiO <sub>2</sub> -P25             | 1                                    | Photocatalysis           | 1                                                  | 5.2x10 <sup>-3</sup>                             | (Oros-Ruiz et<br>al. 2013)   |
| Ag/TiO <sub>2</sub> -P25             | 1                                    | Photocatalysis           | 1                                                  | 5.2x10 <sup>-3</sup>                             | (Oros-Ruiz et<br>al. 2013)   |

|                          |   |                |   |                      |                         |
|--------------------------|---|----------------|---|----------------------|-------------------------|
| Cu/TiO <sub>2</sub> -P25 | 1 | Photocatalysis | 1 | 4.5x10 <sup>-3</sup> | (Oros-Ruiz et al. 2013) |
| Ni/TiO <sub>2</sub> -P25 | 1 | Photocatalysis | 1 | 3.0x10 <sup>-3</sup> | (Oros-Ruiz et al. 2013) |

283

284 **References**

285 Annamalai S, Shin WS (2022) Efficient degradation of trimethoprim with ball-milled nitrogen-doped biochar  
 286 catalyst via persulfate activation. *Chemical Engineering Journal* 440:135815

287 Bolobajev J, Kask M, Kreek K, et al (2019) Metal-doped organic aerogels for photocatalytic degradation of  
 288 trimethoprim. *Chemical Engineering Journal* 357:120–128.  
 289 <https://doi.org/https://doi.org/10.1016/j.cej.2018.09.127>

290 Grilla E, Vakros J, Konstantinou I, et al (2020) Activation of persulfate by biochar from spent malt rootlets for  
 291 the degradation of trimethoprim in the presence of inorganic ions. *Journal of Chemical Technology &*  
 292 *Biotechnology* 95:2348–2358

293 Malefane ME, Feleni U, Mafa PJ, Kuvarega AT (2020) Fabrication of direct Z-scheme Co<sub>3</sub>O<sub>4</sub>/BiOI for  
 294 ibuprofen and trimethoprim degradation under visible light irradiation. *Appl Surf Sci* 514:145940

295 Oros-Ruiz S, Zanella R, Prado B (2013) Photocatalytic degradation of trimethoprim by metallic nanoparticles  
 296 supported on TiO<sub>2</sub>-P25. *J Hazard Mater* 263:28–35.  
 297 <https://doi.org/https://doi.org/10.1016/j.jhazmat.2013.04.010>

298

299

300
